# Supplementary material
Source: PubMed Central journal article supplement (PMC2699358)

## **The deubiquitinases USP33 and USP20 coordinate $\beta$ 2 adrenergic receptor recycling and resensitization**

Magali Berthouze<sup>1</sup>, Vidya Venkatramanan<sup>1</sup>, Yi Li<sup>1</sup> and Sudha K. Shenoy\*<sup>1,2</sup>

### **Supplementary Information**

#### **Materials and Methods:**

**Cell lines:** COS-7 and HEK-293 cells were obtained from the American Type Culture Collection and were maintained respectively in Dulbecco's modified Eagle's medium or in Minimal Essential Medium (Sigma) supplemented with 10% foetal bovine serum and 1% penicillin/streptomycin. Transfections were performed using Lipofectamine 2000 reagent (Invitrogen) or FuGENE 6 Transfection Reagent (Roche Applied Science).

**Synthesis of Small Interfering RNAs (siRNAs).** Double-stranded siRNAs, with 19-nucleotide duplex RNA and 2-nucleotide 3'-dTdT overhangs, were chemically synthesized, in deprotected and desalted form (DHARMACON). Sequences of siRNA oligonucleotides are:

USP33-1 GAUCAUGUGGCGAAGCAUA

USP33-2 GGCUUGGAUCUUCAGCCAU

USP20-1 CGUCGUACGUGCUC AAGAA

USP20-2 GGACAAUGAUGCUCACCUA

A non-silencing RNA duplex (5'-AAUUCUCCGAACGUGUCACGU-3'), as the manufacturer indicated, was used as a control. Gene Silencer (GenLantis) reagent was used for transfection of siRNA except for immunostaining experiments, where Lipofectamine 2000 was used.

**USP enzymatic activity measured by in vitro assay.** COS-7 cells transfected transiently with the HA-USP33 WT or mutants were solubilized in lysis buffer containing 50 mM HEPES (pH 7.5), 0.5% Nonidet P-40, 250 mM NaCl, 10% (v/v) glycerol and anti-proteases (1

mM sodium orthovanadate, 1 mM sodium fluoride, 1 mM phenylmethylsulfonyl fluoride, leupeptin (5 µg/ml), aprotinin (5 µg/ml), pepstatin A (1 µg/ml), benzaminidine (100 µM); Sigma). After centrifugation, soluble extracts were mixed with EZview™ Red Anti-HA Affinity Gel (Sigma) and rotated at 4 °C overnight. Nonspecific binding was eliminated by repeated washes with lysis buffer. By competition with a HA-peptide, bound enzymes were eluted and concentrated with Vivaspin ultrafiltration spin columns (50000 MWCO; Vivascience). Purified enzymes (0.2 – 0.5 µg) were incubated with the polyubiquitin chain (K48 or K63) at 37 °C. SDS buffer was then added and the cleaved fragments of ubiquitin chains were separated on a gradient gel (Invitrogen) and stained with Coomassie Blue.

## Supplementary Figure legends

### Figure S1: USP33 inhibits $\beta_2$ AR ubiquitination in COS-7 cells

**A.** COS-7 cells were transfected transiently with pcDNA3 or HA-USP33 and stimulated with Iso (10  $\mu$ M) for 15 min. The Flag- $\beta_2$ AR was immunoprecipitated with M2 Flag affinity beads and ubiquitinated receptor detected with an anti-ubiquitin antibody (upper panel). The amounts of Flag-tagged  $\beta_2$ AR, and phosphorylated receptors in the IP were detected with specific antibodies (M2 anti-Flag and an anti-phospho $\beta_2$ AR (serines 355, 356)). Expression of USP33 is detected in the lowest panel. **B.** The bar graphs represent the ratio between the  $\beta_2$ AR ubiquitination signal obtained after Iso stimulation and the ubiquitination signal obtained in nonstimulated condition. The result is the mean  $\pm$  SEM of 6 independent experiments. Statistical analyses were performed by a paired t test \*\*\*  $p < 0.001$ .

### Figure S2: Cellular distribution of HA-USP33 and $\beta_2$ ARs

**A.** HA-USP33 was transiently expressed in HEK-293 cells and immunostained with an anti-USP33 antibody followed by a secondary anti-rabbit Alexa594 (left panel, red) or with 12CA5 anti-HA antibody followed by a secondary anti-mouse Alexa 633 (right panel, red). Scale bar = 10  $\mu$ m. **B.** Confocal micrographs display  $\beta_2$ AR-YFP (green) and HA-USP33 (red) in the merged panels in HEK-293 cells that have been stimulated with Iso for indicated times. Individual protein distribution is shown in black and white. A small region is enlarged for detailed viewing. Arrows indicate regions of colocalization between HA-USP33 and  $\beta_2$ AR.

### Figure S3: USP33 mutants bind the $\beta_2$ AR

HA-USP33 (WT, HIS, CYS or HIS.CYS) were transiently expressed in HEK-293 cells stably transfected with Flag- $\beta_2$ AR. Flag receptor immunoprecipitates were isolated from unstimulated and Iso-stimulated cells and analyzed for USP33 (top panel) and receptor

(middle panel) amounts by Western blotting. The expression levels of the USP33 constructs are shown in the lysate panel.

**Figure S4: Amino acid sequence alignment of human USP33 (hUSP33) and USP20 (hUSP20).**

USP33 and USP20 are identical in approximately 59% of the amino acids with strong homology in the N-terminus and C-terminus and a weaker similarity in the middle region (conserved residues are boxed). Conserved cysteine and histidine are indicated by *arrows*. Cys- and His-boxes are underlined.

**Figure S5: Agonist-stimulated  $\beta_2$ AR trafficking in control and USP 20 and 33 depleted cells**

HEK-293 cells expressing Flag- $\beta_2$ AR-mYFP are transfected either with siRNA targeting nothing (control) or USPs 20 and 33. After Iso (10  $\mu$ M) stimulation for the indicated times, cells were fixed and stained with anti-LAMP2 antibodies. Merged images of representative confocal scans are shown with the  $\beta_2$ AR in green and LAMP2 in red (Alexa 594). Yellow indicates colocalization of receptor and LAMP2.



# Figure S1

## A

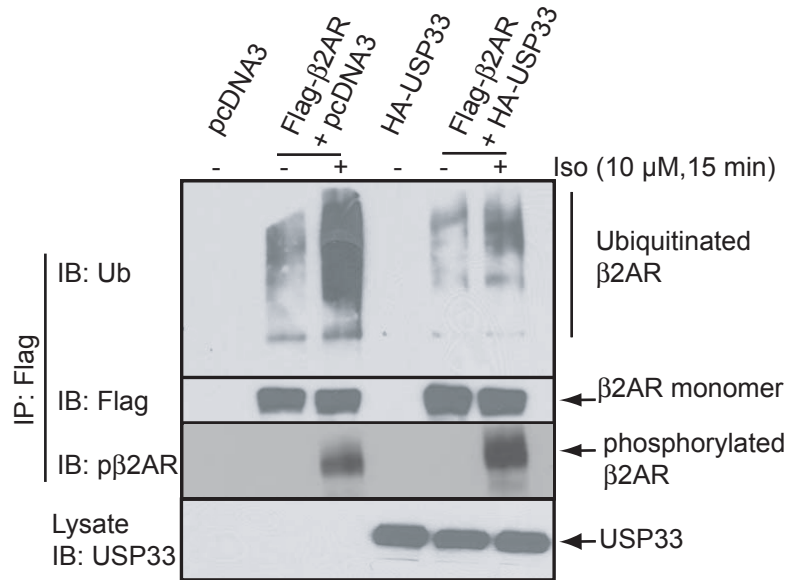

## B

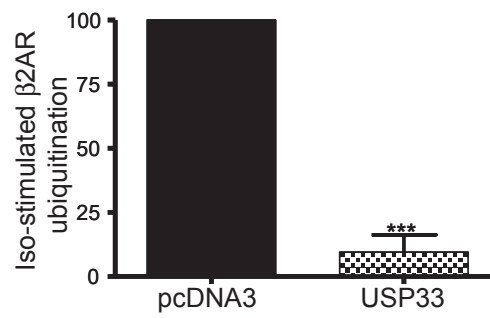

Figure S2

**A**

USP33 antibody; Alexa 594

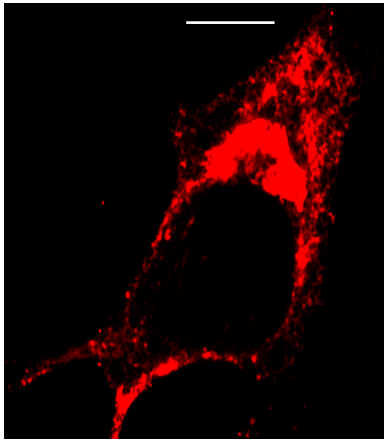

HA antibody; Alexa 633

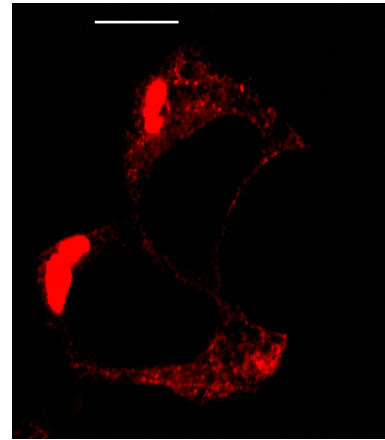

**B**

USP33

$\beta$ 2AR

MERGE

NS

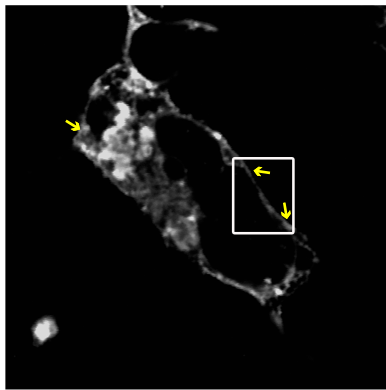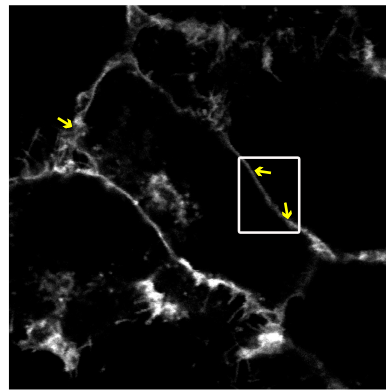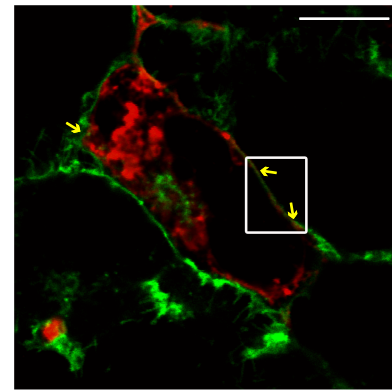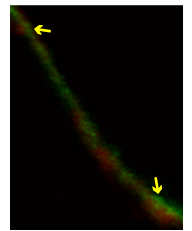

15'

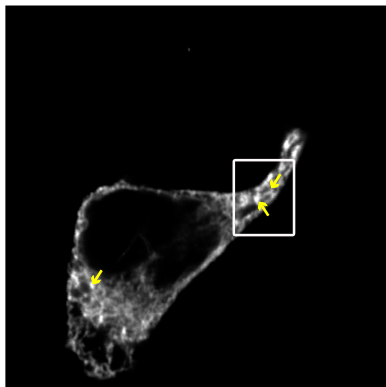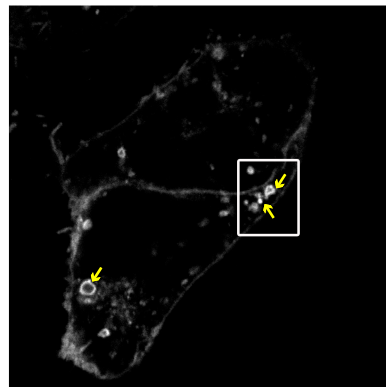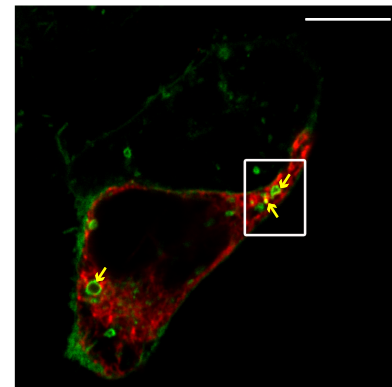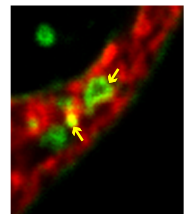

60'

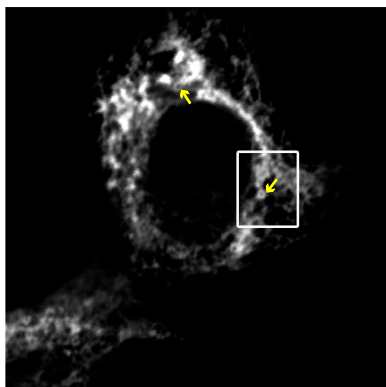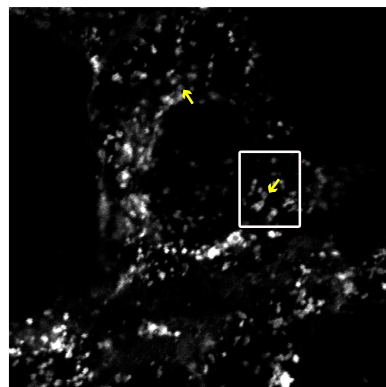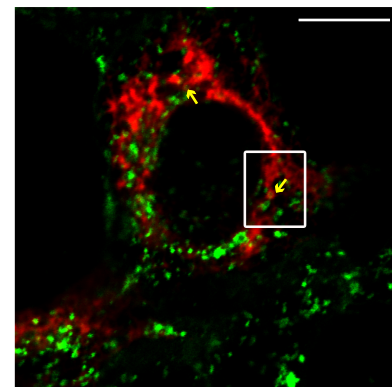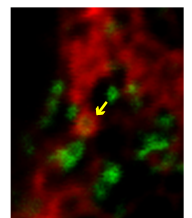



Figure S4

|        |              |             |             |             |             |             |     |
|--------|--------------|-------------|-------------|-------------|-------------|-------------|-----|
| hUSP33 | MSAFRNHCPH   | LDSVGEITKE  | DLIQKSLGTC  | QDCKVQGPNI  | WACLENRC SY | VGCGESQVDH  | 60  |
| hUSP20 | MGDSRDLCPH   | LDSIGEVTKL  | DLLLKSKGTC  | QSCGVTGPNI  | WACLQVACPY  | VGCGESFADH  | 60  |
| hUSP33 | STIHSQETKH   | YLTVNLTTLR  | VWCYACSKEV  | FLDRKLGTP   | SLPHVRQPHQ  | IQENSVQDFK  | 120 |
| hUSP20 | STIHAQAKKH   | NLTVNLITFR  | LWCYACEKEV  | FLEQRLAA--  | --PLLGSSSK  | FSE--QDSP   | 113 |
| hUSP33 | IPSNTTLKTP   | LVAVFDDLDI  | EADEEDELRA  | RGLTGLKNIG  | NTCYMNAALQ  | ALSNCPPPTQ  | 180 |
| hUSP20 | PESHPLKAV    | PIAVADEGES  | ES-EDDDLKP  | RGLTGMKNLG  | NSCYMNAALQ  | ALSNCPPPTQ  | 171 |
| hUSP33 | FFLDCGGLAR   | TDKKPAICKS  | YKLIMTELWH  | KSRPGSVVPT  | TLFQGIKTVN  | PTFRGYSQQD  | 240 |
| hUSP20 | FFLECGGLVR   | TDKKPALCKS  | YQKLVSEVWH  | KKRPSYVVPT  | SLSHGIKLVN  | PMFRGYAQQD  | 231 |
| hUSP33 | AQEFRLCLMD   | LLHEELKEQV  | MEV-----EE  | DPQITITTEET | MEEDKKSQSDV | DFQSCESC SN | 295 |
| hUSP20 | TQEFRLCLMD   | QLHEELKEPV  | VATVALTEAR  | DSDSSDTDEK  | REGDRSPSED  | EFLSCDS--S  | 289 |
| hUSP33 | SDRAENENG S  | RCFSEDNNET  | TMLIQDDENN  | SEMSKDWQKE  | KMCN-KINKV  | NSEGEFDKDR  | 354 |
| hUSP20 | SDRGE G DGQ  | RGGGSSQAET  | ELIIPDEAGR  | AISEKERMKD  | RKFSWGQQR T | NSE-QVDEDA  | 348 |
| hUSP33 | DSISETVDLN   | NQETVKVQIH  | SRAS-----   | EYITDVHSND  | LSTP-QILPS  | NEGVNPRLSA  | 407 |
| hUSP20 | DVDTAMAALD   | DQPAEAQPPS  | PRSSSPCRTP  | EPDND AHLRS | SSRPCSPVHH  | HEG-HAKLSS  | 407 |
| hUSP33 | SPEKSGNLWP   | GLAPPH--KK  | AQ--SASP KR | KKQHKKYRSV  | ISDIFDGTII  | SSVQCLTC DR | 463 |
| hUSP20 | SPE RASPV--  | RMAPSYVLKK  | AQVLSAGSRR  | RKE-QRYRSV  | ISDIFDGSIL  | SLVQCLTC DR | 464 |
| hUSP33 | VSVTLETTFQD  | LSLPIPGKED  | LAKLHSSSHP  | TSIVKAGSCG  | EAYAPQGWIA  | FFMEYVKRFV  | 523 |
| hUSP20 | VSTTVETTFQD  | LSLPIPGKED  | LAKLHSAIQ   | NVPAKPGACG  | DSYAAQGWLA  | FIVEYIRRFV  | 524 |
| hUSP33 | VSCVPSWFWG   | PVVTLQDCLA  | AFFARDELKG  | DNMYSCEKCK  | KLRNGVKFCK  | VQNFPEILCI  | 583 |
| hUSP20 | VSC T PSWFWG | PVVTLEDCLA  | AFFAADELKG  | DNMYS CERCK | KLRNGVKYCK  | VLRLPEILCI  | 584 |
| hUSP33 | HLKRFRHELM   | FSTKISTHVS  | FPLEGLDLQP  | FLAKDSPAQI  | VTYDLLSVIC  | HHGTASSGHY  | 643 |
| hUSP20 | HLKRFRHEVM   | YSFKINSHVS  | FPLEGLDLRP  | FLAKECTSQI  | TTYDLLSVIC  | HHGTASSGHY  | 644 |
| hUSP33 | IAYCRNNLNN   | LWYEFDDQSV  | TEVSESTVQN  | AEAYVLFYRK  | SSEEAQKERR  | RISNLLNIME  | 703 |
| hUSP20 | IAYCQNVING   | QWYEFDDQYV  | TEVHETVQVN  | AEGYVLFYRK  | SSEEA MRERQ | QVVS LAAMRE | 704 |
| hUSP33 | PSLLQFYISR   | QWLNKFKTFA  | EPGPISN NDF | LCIHGGV PPR | KAGYIEDLVL  | MLPQNIWDNL  | 763 |
| hUSP20 | PSLLRFYVSR   | EWLNKFNTFA  | EPGPITN QTF | LC SHGGIPPH | KYHYIDDLV   | ILPQNVWEHL  | 764 |
| hUSP33 | YSRYGGGPAV   | NHLYICHTCQ  | IEAEKIEKRR  | KTELEIFIRL  | NRAFQKEDSP  | ATFYCISMQW  | 823 |
| hUSP20 | YNRFGGGPAV   | NHLYVCSICQ  | VEIEALAKRR  | RIEIDTFIKL  | NKAFQAEESP  | GVIYCISMQW  | 824 |
| hUSP33 | FREWESFVKG   | KDGDPPGPID  | NTKIAVTK-C  | GNVMLRQGAD  | SGQISEETWN  | FLQSIYGGGP  | 882 |
| hUSP20 | FREWEAFVKG   | KDNEPPGPID  | NSRIAQVKGS  | GHVQLKQGAD  | YGQISEETWT  | YLNSLYGGGP  | 884 |
| hUSP33 | EVILRPPVVH   | -VDPDILQAE  | EKIEVETRSL  | 911         |             |             |     |
| hUSP20 | EIAIRQSV AQ  | PLG PENLHGE | QKIEAETRAV  | 914         |             |             |     |

**Figure S5**

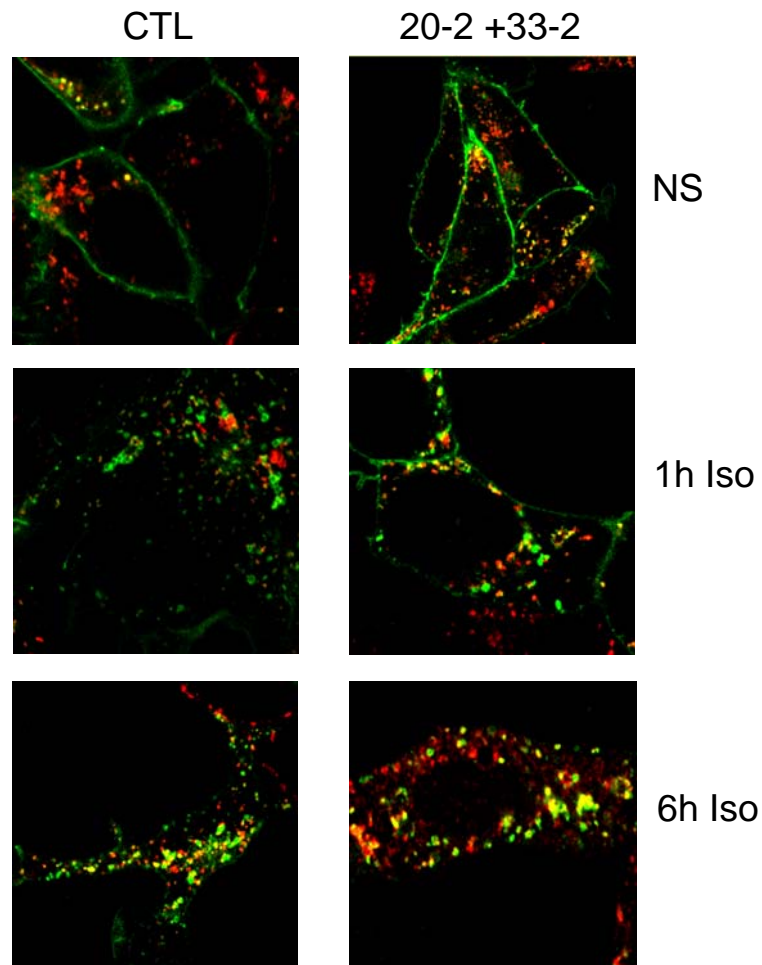

Supplement: emboj2009128s1.pdf [file emboj2009128s1.pdf]
